# Supplementary material for: Response rates in patients with schizophrenia and positive symptoms receiving cognitive behavioural therapy: a systematic review and single-group meta-analysis
Source: Springer Nature journal article supplement (doi:10.1186/s12888-018-1964-8), 2018-12-01

# Risk of bias assessment

## Risk of bias summary

|                   | Random sequence generation (selection bias) | Allocation concealment (selection bias) | Blinding of participants and personnel (performance bias) | Blinding of outcome assessment (detection bias) | Incomplete outcome data (attrition bias) | Selective reporting (reporting bias) | Researchers Allegiance | Other bias |
|-------------------|---------------------------------------------|-----------------------------------------|-----------------------------------------------------------|-------------------------------------------------|------------------------------------------|--------------------------------------|------------------------|------------|
| Barrowclough 2006 | +                                           | +                                       | -                                                         | +                                               | -                                        | +                                    | ?                      | +          |
| Bechdorf 2004     | +                                           | ?                                       | -                                                         | +                                               | -                                        | -                                    | +                      | +          |
| Birchwood 2014    | +                                           | +                                       | -                                                         | +                                               | +                                        | -                                    | -                      | ?          |
| Drury 1996        | ?                                           | ?                                       | -                                                         | -                                               | -                                        | ?                                    | ?                      | +          |
| Durham 2003       | +                                           | +                                       | -                                                         | +                                               | -                                        | -                                    | ?                      | ?          |
| England 2007      | +                                           | ?                                       | -                                                         | ?                                               | ?                                        | ?                                    | -                      | +          |
| Foster 2010       | ?                                           | ?                                       | -                                                         | -                                               | -                                        | ?                                    | ?                      | +          |
| Freeman 2014      | +                                           | ?                                       | -                                                         | +                                               | ?                                        | +                                    | -                      | +          |
| Freeman 2015a     | +                                           | ?                                       | -                                                         | +                                               | -                                        | -                                    | -                      | +          |
| Freeman 2015b     | +                                           | ?                                       | -                                                         | +                                               | -                                        | +                                    | -                      | +          |
| Garety 2008       | +                                           | +                                       | -                                                         | +                                               | -                                        | +                                    | -                      | +          |
| Gottlieb 2017     | ?                                           | ?                                       | -                                                         | ?                                               | -                                        | +                                    | -                      | +          |
| Haddock 1999      | ?                                           | ?                                       | -                                                         | ?                                               | -                                        | ?                                    | -                      | +          |
| Haddock 2009      | +                                           | ?                                       | -                                                         | +                                               | -                                        | ?                                    | ?                      | +          |
| Hazell 2016       | ?                                           | +                                       | -                                                         | ?                                               | ?                                        | ?                                    | -                      | ?          |
| Krakovik 2013     | ?                                           | ?                                       | -                                                         | -                                               | +                                        | +                                    | +                      | ?          |
| Kuipers 1997      | ?                                           | ?                                       | -                                                         | -                                               | -                                        | -                                    | -                      | ?          |
| Lecomte 2008      | ?                                           | ?                                       | -                                                         | ?                                               | ?                                        | -                                    | -                      | +          |
| Lee 2012          | ?                                           | ?                                       | -                                                         | ?                                               | -                                        | ?                                    | ?                      | +          |
| Lee 2013 PT       | ?                                           | ?                                       | -                                                         | ?                                               | -                                        | ?                                    | ?                      | +          |
| Levine 1998       | ?                                           | ?                                       | -                                                         | -                                               | -                                        | ?                                    | -                      | +          |
| Li 2015           | +                                           | +                                       | -                                                         | ?                                               | ?                                        | -                                    | -                      | +          |
| Morrison 2014     | +                                           | +                                       | -                                                         | +                                               | +                                        | -                                    | -                      | +          |
| Penn 2009         | +                                           | ?                                       | -                                                         | +                                               | ?                                        | ?                                    | -                      | +          |
| Pinninti 2010     | +                                           | ?                                       | -                                                         | ?                                               | -                                        | ?                                    | +                      | +          |
| Rector 2003       | ?                                           | ?                                       | -                                                         | +                                               | -                                        | +                                    | -                      | ?          |
| Sensky 2000       | ?                                           | ?                                       | -                                                         | ?                                               | ?                                        | -                                    | -                      | +          |
| Startup 2004      | +                                           | ?                                       | -                                                         | -                                               | -                                        | ?                                    | +                      | +          |
| Tarrier 1998      | ?                                           | ?                                       | -                                                         | +                                               | +                                        | -                                    | -                      | ?          |
| Valmaggia 2005    | +                                           | ?                                       | -                                                         | ?                                               | -                                        | ?                                    | -                      | ?          |
| van der Gaag 2011 | ?                                           | ?                                       | -                                                         | ?                                               | -                                        | -                                    | ?                      | +          |
| Wykes 2005        | ?                                           | ?                                       | -                                                         | -                                               | -                                        | ?                                    | -                      | +          |

Risk of bias graph

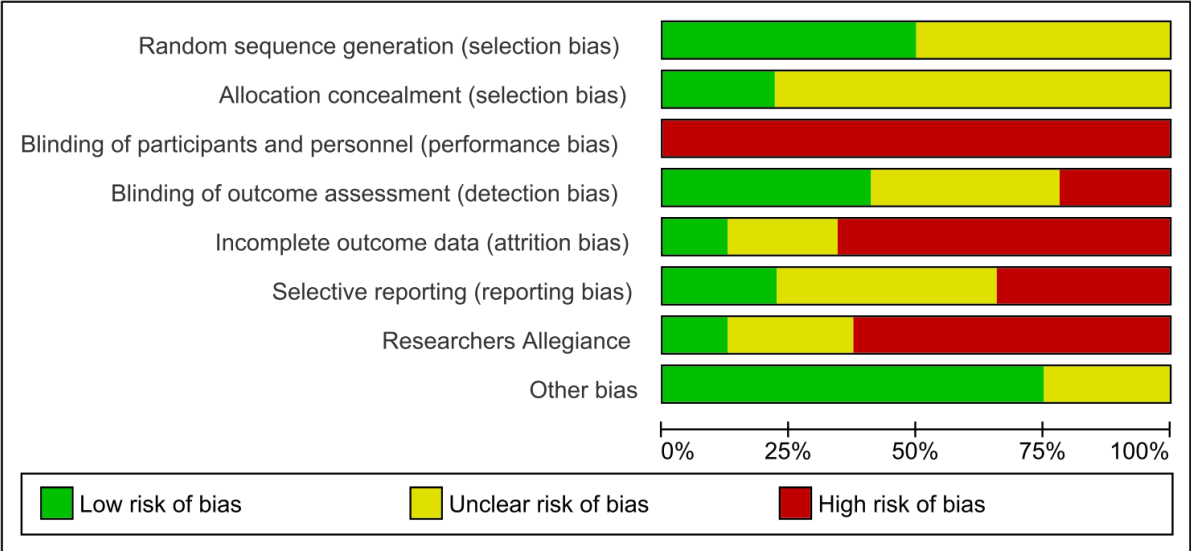

Supplement: MOESM2 [file 16314178]
