# Supplementary material for: Response rates in patients with schizophrenia and positive symptoms receiving cognitive behavioural therapy: a systematic review and single-group meta-analysis
Source: Springer Nature journal article supplement (doi:10.1186/s12888-018-1964-8), 2018-12-01
Supplement: MOESM1 [file 16314178]

## Characteristics of included studies

|                       | Country                             | Study treatments (number of patients)                                       | Trial duration (weeks) | Number of sessions | Study design | Characteristics of patients                                                                                                                                                       |
|-----------------------|-------------------------------------|-----------------------------------------------------------------------------|------------------------|--------------------|--------------|-----------------------------------------------------------------------------------------------------------------------------------------------------------------------------------|
| Barrowclough 2006 (1) | UK                                  | Cognitive Behavioural Therapy (n=57), TAU (n=56)                            | 26                     | 10.4               | SB           | 82 (73%) men, 31 women (27%); mean age 38.83 years; baseline PANSS total score 63.8, positive symptoms 17.4, negative symptoms 14.1; duration of illness 13.67 years              |
| Bechdolf 2004 (2)     | Germany                             | Cognitive Behavioural Therapy (n=40), Psychoeducation (n=48)                | 8                      | 11.9               | SB           | Inpatients; 40 (45%) men, 48 women (55%); mean age 31.8 years; baseline PANSS total score 63.75, positive symptoms 14.35, negative symptoms 16.95; duration of illness 4.45 years |
| Birchwood 2014 (3)    | UK                                  | Cognitive Behavioural Therapy (n=98), TAU (n=99)                            | 39                     | 19                 | SB           | 113 (57%) men, 84 women (43%); mean age 37.35 years; baseline PANSS total score 71.73, positive symptoms 19.38, negative symptoms 16.02; duration of illness 15.21 years          |
| Drury 1996 (4)        | UK                                  | Cognitive Therapy <sup>1</sup> (n=30), Recreation and support (n= 32)       | 12                     | NA                 | OL           | Inpatient; 25 (63%) men, 15 women (37%); mean age 30.7 years; baseline PAS positive symptoms score 6; duration of illness 6.15 years                                              |
| Durham 2003 (5)       | Scotland                            | Cognitive Behavioural Therapy (n=22), Supportive Therapy (n=23), TAU (n=21) | 39                     | 20                 | SB           | Inpatients and outpatients; 45 (68%) men, 21 women (32%); mean age 36.3 years; baseline PANSS total score 96.63, PSYRATS total 35.57; duration of illness 13 years                |
| England 2007 (6)      | NA (author's affiliation in Canada) | Cognitive nursing intervention <sup>1</sup> (n=44), TAU (n=21)              | 18                     | 12                 | SB           | Outpatient; mean age 41 years; baseline BPRS-18 total score 51.05                                                                                                                 |
| Foster 2010 (7)       | UK                                  | Cognitive Behavioural Therapy (n= 12), TAU (n=12)                           | 4                      | 4                  | OL           | Inpatients and outpatients; 14 (58%) men, 10 women (42%); mean age 36.3 years; baseline PSYRATS total score 35.57                                                                 |
| Freeman 2014 (8)      | UK                                  | Cognitive Behavioural Therapy (n=15), TAU (n=15)                            | 8                      | 6                  | SB           | Outpatients; 20 (67%) men, 10 women (33%); mean age 41.5 years; baseline PSYRATS total score 18.25                                                                                |
| Freeman 2015a (9)     | UK                                  | Cognitive Behavioural Therapy (n=73), TAU (n=77)                            | 8                      | 5.5                | SB           | Inpatients and outpatients; 86 (57%) men, 64 women (43%); mean age 36.3 years; baseline PANSS total score 41.5, PSYRATS total 18.35                                               |
| Freeman 2015b (10)    | UK                                  | Cognitive Behavioural Therapy (n=24), TAU (n=26)                            | 12                     | 7.3                | SB           | Outpatients; 34 (68%) men, 16 women (32%); mean age 40.9 years; baseline PANSS total score 81.65, baseline PSYRATS total 41.6                                                     |
| Garety 2008a (11)     | UK                                  | Cognitive Behavioural Therapy (n=27), Family Intervention (n=28),           | 39                     | 13.9               | SB           | Inpatients and outpatients; 60 (72%) men, 23 (28%) women; mean age 36.4 years; baseline PANSS total score 67.31, positive symptoms 17.16, negative symptoms 15.58;                |

|                    |                                     |                                                                                |    |      |    |                                                                                                                                                                                                                                       |
|--------------------|-------------------------------------|--------------------------------------------------------------------------------|----|------|----|---------------------------------------------------------------------------------------------------------------------------------------------------------------------------------------------------------------------------------------|
| Garety 2008b (11)  | UK                                  | TAU (n=28)<br>Cognitive Behavioural Therapy (n=106), TAU (n=112)               | 39 | 14.3 | SB | duration of illness 11.57 years<br>Inpatients and outpatients; 151 (69%) men, 67 (31%) women; mean age 38.1 years; baseline PANSS total score 64.29, positive symptoms 18.51, negative symptoms 12.38; duration of illness 10.4 years |
| Gottlieb 2017 (12) | USA                                 | Cognitive Behavioural Therapy (n=19), TAU (n=18)                               | 24 | 10   | SB | Outpatients; 23 (62%) men, 14 women (38%); mean age 42.04 years; baseline BPRS-24 total score 54.92, PSYRATS 53.06, BPRS negative symptoms 6.23                                                                                       |
| Haddock 1999 (13)  | UK                                  | Cognitive Behavioural Therapy (n=10), Supportive counselling (n=11)            | 5  | 10.2 | SB | Inpatients; 19 (90%) men, 2 women (10%); mean age 29.05 years; baseline BPRS total score 53.1                                                                                                                                         |
| Haddock 2009 (14)  | UK                                  | Cognitive Behavioural Therapy (n=38), Social Activity Therapy (n=39)           | 26 | 17   | SB | Inpatients and outpatients; 66 (86%), 11 (14%) women; mean age 34.8 years; baseline PANSS total score 63.81, positive symptoms 27.6, negative symptoms 13.04                                                                          |
| Hazell 2016 (15)   | England                             | Cognitive Behavioural therapy (n=15), Waitlist (n=15)                          | 12 | 8    | SB | Only protocol, authors confirmed that inclusion criteria are met and provided some outcome data, but no descriptive of patients are available in detail                                                                               |
| Krakvik 2013 (16)  | Norway                              | Cognitive Behavioural Therapy (n=23), Waitlist (n=22)                          | 26 | 20   | OL | Inpatients and outpatients; 29 (64%) men, 16 (36%) women; mean age 36.35 years; baseline PANSS total score 60.2, positive symptoms 16.05, negative symptoms 11.75                                                                     |
| Kuipers 1997 (17)  | UK                                  | Cognitive Behavioural Therapy (n=28), TAU (n=32)                               | 39 | 18.6 | OL | Inpatients and outpatients; 38 (63%) men, 22 (37%) women; mean age 25.45 years; duration of illness 13.05 years                                                                                                                       |
| Lecomte 2008 (18)  | Canada                              | Cognitive Behavioural Therapy (n=48), Social Skills Training (n=54), WL (n=27) | 13 | 24   | SB | Outpatients; 93 (72%) men, 36 (28%) women; mean age 24.49 years; baseline BPRS-E total score 41.67, BPRS positive symptoms 2, negative symptoms 1.8; duration of illness 2.69                                                         |
| Lee 2012 (19)      | South Korea                         | Cognitive behavioural Social Skills Training <sup>1</sup> (n=12), TAU (n=13)   | 7  | 12   | SB | Inpatients; 8 (40%) men, 12 (60%) women; mean age 52.22 years; baseline BPRS total score 33.28, SAPS positive symptoms 42.24, SANS negative symptoms 50.05; duration of illness 19.19 years                                           |
| Lee 2013 (20)      | South Korea                         | Cognitive Behavioural Therapy (n=25), Supportive Therapy (n=25)                | 32 | 20.1 | SB | Inpatients and outpatients; 21 (57%) men, 16 (43%) women; mean age 41.25 years; baseline PANSS total score 61.25, positive symptoms 18.95, negative symptoms 13.85; duration of illness 15.8 years                                    |
| Levine 1998 (21)   | NA (author's affiliation in Israel) | Cognitive Therapy <sup>1</sup> (n=6), Supportive Therapy (n=6)                 | 6  | 6    | NA | 12 (100%) men; mean age 34.5 years; baseline PANSS total score 57.95, positive symptoms 15.45, negative symptoms 13.3; duration of illness 10.92 years                                                                                |
| Li 2015 (22)       | China                               | Cognitive Behavioural Therapy (n=96),                                          | 24 | 15   | SB | Inpatients and outpatients; 72 (38%) men, 120 (63%) women; mean age 31.36 years; baseline PANSS total score                                                                                                                           |

|                        |                         |                                                                                    |    |       |    |                                                                                                                                                                                                                           |
|------------------------|-------------------------|------------------------------------------------------------------------------------|----|-------|----|---------------------------------------------------------------------------------------------------------------------------------------------------------------------------------------------------------------------------|
| Morrison 2014 (23)     | UK                      | Supportive Therapy (n=96)<br>Cognitive Therapy <sup>1</sup> (n=37), TAU (n=37)     | 39 | 13.3  | SB | 72.6, positive symptoms 23.43, negative symptoms 20.4; duration of illness 8.21<br>39 (53%) men, 35 (47%) women; mean age 31.32 years; baseline PANSS total score 71.76, positive symptoms 20.98, negative symptoms 14.52 |
| Penn 2009 (24)         | USA                     | Cognitive Behavioural Therapy (n=32),<br>Supportive Therapy (n=33)                 | 12 | 8.3   | SB | Outpatients; 33 (51%) men, 32 (49%) women; mean age 40.65 years; baseline PANSS total score 61.75, positive symptoms 17.55, negative symptoms 13.9; duration of illness 15.4 years                                        |
| Pinninti 2010 (25)     | USA                     | Cognitive Behavioural Therapy (n=18), TAU (n=15)                                   | 12 | 11.93 | SB | Outpatients; 11 (44%) men, 14 (56%) women; mean age 40.49 years; baseline PSYRATS positive symptoms score 32.3; duration of illness 21.4 years                                                                            |
| Rector 2003 (26)       | Canada                  | Cognitive Behavioural Therapy (n=24), TAU (n=21)                                   | 26 | 20    | SB | Outpatients; 20 (48%) men, 22 (52%) women; mean age 51.6 years; baseline PANSS total score 63.4, positive symptoms 14.8, negative symptoms 15.95; duration of illness 15.1 years                                          |
| Sensky 2000 (27)       | UK                      | Cognitive Behavioural Therapy (n=46),<br>Befriending (n=44)                        | 39 | 19    | SB | 53 (59%) men, 37 (41%) women; mean age 39.5 years; baseline CPRS schizophrenia change scale total score 10.7, SANS 33.45; duration of illness 14.5 years                                                                  |
| Startup 2004 (28)      | UK                      | Cognitive Behavioural Therapy (n=47), TAU (n=43)                                   | 26 | 12.9  | OL | Inpatients; 68 (76%) men, 22 (24%) women; mean age 30.8 years; baseline BPRS-16 total score 45.75, SAPS positive symptoms 10.7, SANS negative symptoms 8.9; duration of illness 6.95 years                                |
| Tarrier 1998 (29)      | UK                      | Cognitive Behavioural Therapy (n=33),<br>Supportive Counselling (n=26), TAU (n=28) | 10 | 20    | SB | 54 (75%) men, 18 (25%) women; mean age 39.54 years; baseline BPRS hallucinations positive symptoms 21.4, SANS negative symptoms 11.55; duration of illness 14.14 years                                                    |
| Valmaggia 2005 (30)    | Netherlands,<br>Belgium | Cognitive Behavioural Therapy (n=36),<br>Supportive Counselling (n=26)             | 23 | 16    | SB | Inpatients; 41 (71%) men, 17 (29%) women; mean age 35.48 years; baseline PANSS total score 65.4, positive symptoms 17.85, negative symptoms 13.91; duration of illness 9.2 years                                          |
| van der Gaag 2011 (31) | Netherlands             | Cognitive Behavioural Therapy (n=110), TAU (n=106)                                 | 26 | 13    | SB | 153 (71%) men, 63 (29%) women; mean age 36.99 years; baseline PANSS total score 69.3, PSYRATS total 31.35; duration of illness 10.58 years                                                                                |
| Wykes 2005 (32)        | UK                      | Cognitive Behavioural Therapy (n=45), TAU (n=40)                                   | 10 | 7     | OL | Outpatients; 50 (59%) men, 35 (41%) women; mean age 39.7 years; baseline PSYRATS hallucination score 27.95                                                                                                                |

<sup>1</sup> based on the description of the intervention, considered CBT in the analyses. TAU=Treatment as usual, WL=Waitlist, OL=open label, SB=single blind, NA=not available, PANSS=Positive and Negative Syndrome Scale, SAPS=Scale for the Assessment of Positive Symptoms, PSYRATS=Psychotic Symptoms Rating Scale, SANS=Scale for the Assessment of Negative Symptoms, PAS=Psychiatric Assessment Scale

## References

1. Barrowclough C, Haddock G, Lobban F, Jones S, Siddle R, Roberts C et al. Group cognitive-behavioural therapy for schizophrenia. Randomised controlled trial. *Br J Psychiatry* 2006; 189:527–32.
2. Bechdolf A, Knost B, Kuntermann C, Schiller S, Klosterkötter J, Hambrecht M et al. A randomized comparison of group cognitive-behavioural therapy and group psychoeducation in patients with schizophrenia.[Erratum appears in *Acta Psychiatr Scand*. 2004 Dec;110(6):483]. *Acta Psychiatr Scand* 2004; 110(1):21–8.
3. Birchwood M, Michail M, Meaden A, Tarrrier N, Lewis S, Wykes T et al. Cognitive behaviour therapy to prevent harmful compliance with command hallucinations (COMMAND): A randomised controlled trial. *The Lancet Psychiatry* 2014; 1(1):23–33.
4. Drury V, Birchwood M, Cochrane R, Macmillan F. Cognitive therapy and recovery from acute psychosis: a controlled trial. I. Impact on psychotic symptoms. *Br J Psychiatry* 1996; 169(5):593–601.
5. Durham RC, Guthrie M, Morton RV, Reid DA, Treliving LR, Fowler D et al. Tayside-Fife clinical trial of cognitive-behavioural therapy for medication-resistant psychotic symptoms. Results to 3-month follow-up. *Br J Psychiatry* 2003; 182:303–11. 6. England M. Efficacy of cognitive nursing intervention for voice hearing. *Perspectives in psychiatric care* 2007; 43(2):69–76.
7. Foster C, Startup H, Potts L, Freeman D. A randomised controlled trial of a worry intervention for individuals with persistent persecutory delusions. *Journal of behavior therapy and experimental psychiatry* 2010; 41(1):45–51.
8. Freeman D, Pugh K, Dunn G, Evans N, Sheaves B, Waite F et al. An early Phase II randomised controlled trial testing the effect on persecutory delusions of using CBT to reduce negative cognitions about the self: the potential benefits of enhancing self confidence. *Schizophr Res* 2014; 160(1-3):186–92.
9. Freeman D, Dunn G, Startup H, Pugh K, Cordwell J, Mander H et al. Effects of cognitive behaviour therapy for worry on persecutory delusions in patients with psychosis (WIT): a parallel, single-blind, randomised controlled trial with a mediation analysis. *Lancet Psychiatry* 2015; 2(4):305–13.
10. Freeman D, Waite F, Startup H, Myers E, Lister R, McInerney J et al. Efficacy of cognitive behavioural therapy for sleep improvement in patients with persistent delusions and hallucinations (BEST): a prospective, assessor-blind, randomised controlled pilot trial. *Lancet Psychiatry* 2015; 2(11):975–83.
11. Garety PA, Fowler DG, Freeman D, Bebbington P, Dunn G, Kuipers E. Cognitive--behavioural therapy and family intervention for relapse prevention and symptom reduction in psychosis: randomised controlled trial. *Br J Psychiatry* 2008; 192(6):412–23.
12. Gottlieb JD, Gidugu V, Maru M, Tepper MC, Davis MJ, Greenwold J et al. Randomized Controlled Trial of an Internet Cognitive Behavioral Skills-Based Program for Auditory Hallucinations in Persons With Psychosis. *Psychiatric rehabilitation journal* 2017; (Pagination):No Pagination Specified.

13. Haddock G, Tarrrier N, Morrison AP, Hopkins R, Drake R, Lewis S. A pilot study evaluating the effectiveness of individual inpatient cognitive-behavioural therapy in early psychosis. *Soc Psychiatry Psychiatr Epidemiol* 1999; 34(5):254–8.
14. Haddock G, Barrowclough C, Shaw JJ, Dunn G, Novaco RW, Tarrrier N. Cognitive-behavioural therapy v. social activity therapy for people with psychosis and a history of violence: randomised controlled trial. *Br J Psychiatry* 2009; 194(2):152–7.
15. Hazell CM, Hayward M, Cavanagh K, Jones AM, Strauss C. Guided self-help cognitive behavioral intervention for VoicEs (GiVE): study protocol for a pilot randomized controlled trial. *Trials* 2016; 17(1):351.
16. Krakvik B, Grawe RW, Hagen R, Stiles TC. Cognitive behaviour therapy for psychotic symptoms: a randomized controlled effectiveness trial. *Behav* 2013; 41(5):511–24.
17. Kuipers E, Garety P, Fowler D, Dunn G, Bebbington P, Freeman D et al. London-East Anglia randomised controlled trial of cognitive-behavioural therapy for psychosis. I: effects of the treatment phase. *Br J Psychiatry* 1997; 171:319–27.
18. Lecomte T, Leclerc C, Corbiere M, Wykes T, Wallace CJ, Spidel A. Group cognitive behavior therapy or social skills training for individuals with a recent onset of psychosis? Results of a randomized controlled trial. *J Nerv Ment Dis* 2008; 196(12):866–75.
19. Lee DH, Ko SM, Choi YS, Kim KJ, Park H. A Randomized Controlled Pilot Study of Cognitive Behavioral Social Skills Training (Korean version) for Middle- or Older-Aged Patients with Schizophrenia: A Pilot Study. *Journal of Korean Neuropsychiatric Association* 2012; 51(4):192–201.
20. Lee DE, Lee HJ, Yoon OS, Choi IY, Jo JB, Kang KJ. The Effect of Cognitive Behavioral Therapy in Drug-Resistant Patients with Schizophrenia. *Journal of Korean Neuropsychiatric Association* 2013; 52(1):26–32.
21. Levine J, Barak Y, Granek I. Cognitive Group Therapy for Paranoid Schizophrenics: Applying Cognitive Dissonance. *Journal of Cognitive Psychotherapy* 1998; 12(1):3–12.
22. Li ZJ, Guo ZH, Wang N, Xu ZY, Qu Y, Wang XQ et al. Cognitive-behavioural therapy for patients with schizophrenia: a multicentre randomized controlled trial in Beijing, China. *Psychol Med* 2015; 45(9):1893–905.
23. Morrison AP, Turkington D, Pyle M, Spencer H, Brabban A, Dunn G et al. Cognitive therapy for people with schizophrenia spectrum disorders not taking antipsychotic drugs: A single-blind randomised controlled trial. *The Lancet* 2014; 383(9926):1395–403.
24. Penn DL, Meyer PS, Evans E, Wirth RJ, Cai K, Burchinal M. A randomized controlled trial of group cognitive-behavioral therapy vs. enhanced supportive therapy for auditory hallucinations. *Schizophr Res* 2009; 109(1-3):52–9.

25. Pinninti NR, Rissmiller DJ, Steer RA. Cognitive-behavioral therapy as an adjunct to second-generation antipsychotics in the treatment of schizophrenia. *Psychiatric services (Washington, D.C.)* 2010; 61(9):940–3.
26. Rector N, Seeman M, Segal Z. Cognitive therapy of schizophrenia: Toronto trial. 153rd Annual Meeting of the American Psychiatric Association Chicago, Illinois, USA May 13th-18th 2000 2000.
27. Sensky T, Turkington D, Kingdon D, Scott JL, Scott J, Siddle R et al. A randomized controlled trial of cognitive-behavioral therapy for persistent symptoms in schizophrenia resistant to medication. *Arch Gen Psychiatry* 2000; 57(2):165–72.
28. Startup M, Jackson MC, Evans KE, Bendix S. North Wales randomized controlled trial of cognitive behaviour therapy for acute schizophrenia spectrum disorders: two-year follow-up and economic evaluation. *Psychol Med* 2005; 35(9):1307–16.
29. Tarrier N, Yusupoff L, Kinney C, McCarthy E, Gledhill A, Haddock G et al. Randomised controlled trial of intensive cognitive behaviour therapy for patients with chronic schizophrenia. *Bmj* 1998; 317(7154):303–7.
30. Valmaggia LR, van der Gaag M, Tarrier N, Pijnenborg M, Slooff CJ. Cognitive-behavioural therapy for refractory psychotic symptoms of schizophrenia resistant to atypical antipsychotic medication. Randomised controlled trial. *Br J Psychiatry* 2005; 186:324–30.
31. van der Gaag M. CBT in persistent psychotic symptoms affects functioning and suffering. *Eur Arch Psychiatry Clin Neurosci* 2011; 261:S36-s37.
32. Wykes T, Hayward P, Thomas N, Green N, Surguladze S, Fannon D et al. What are the effects of group cognitive behaviour therapy for voices? A randomised control trial. *Schizophr Res* 2005; 77(2-3):201–10.
