# Supplementary material for: Response rates in patients with schizophrenia and positive symptoms receiving cognitive behavioural therapy: a systematic review and single-group meta-analysis
Source: Springer Nature journal article supplement (doi:10.1186/s12888-018-1964-8), 2018-12-01
Supplement: MOESM3 [file 16314178]

## Investigation of small study effect and publication bias

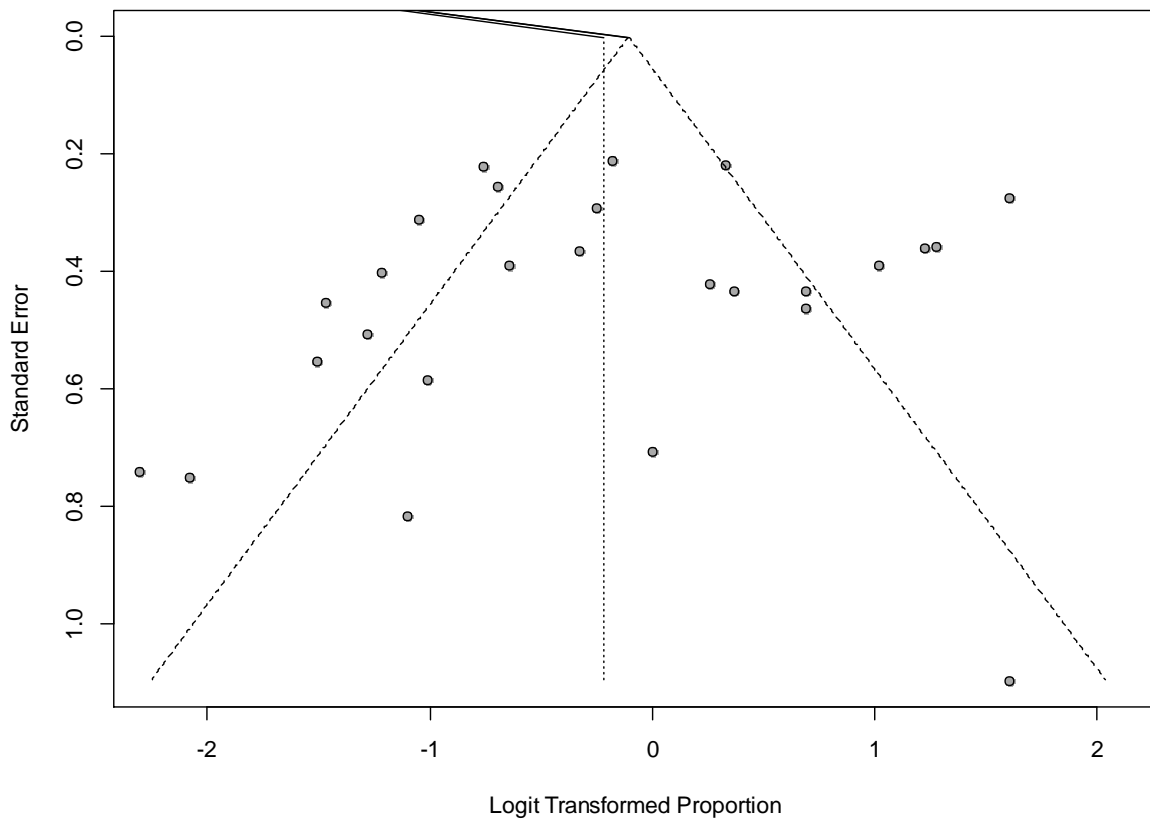

Funnel plot for primary outcome – response in overall symptoms, based on the 20% reduction from baseline threshold

Results of Egger’s test for forest plot asymmetry:

|                                                  |           |           |  |  |
|--------------------------------------------------|-----------|-----------|--|--|
| Linear regression test of funnel plot asymmetry  |           |           |  |  |
| t = -0.82637, df = 24, p-value = 0.4167          |           |           |  |  |
| alternative hypothesis: asymmetry in funnel plot |           |           |  |  |
| sample estimates:                                |           |           |  |  |
| bias                                             | se.bias   | slope     |  |  |
| -1.1261606                                       | 1.3627763 | 0.2695401 |  |  |
